# Supplementary material for: Oligophrenin-1 (OPHN1), a Gene Involved in X-Linked Intellectual Disability, Undergoes RNA Editing and Alternative Splicing during Human Brain Development
Source: PubMed Central journal article supplement (PMC3956665; doi:10.1371/journal.pone.0091351), 2014-03-17
Supplement: pone.0091351.s001.pdf [file pone.0091351.s001.pdf]

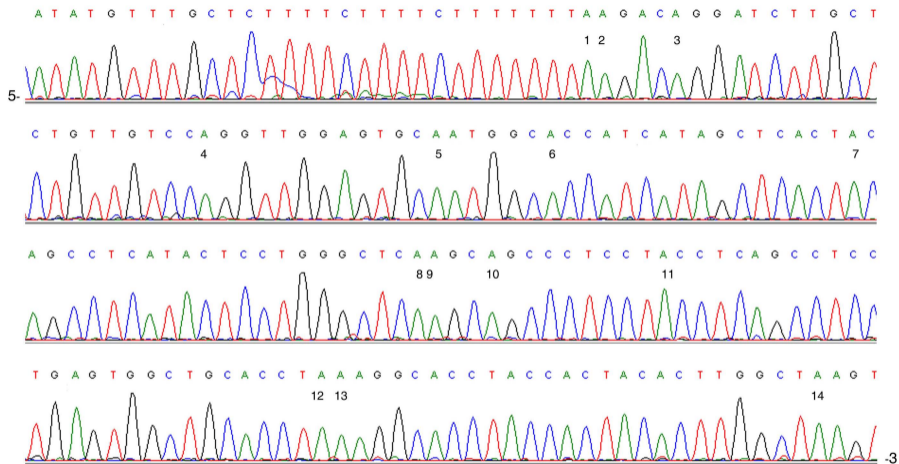

Fig. S1

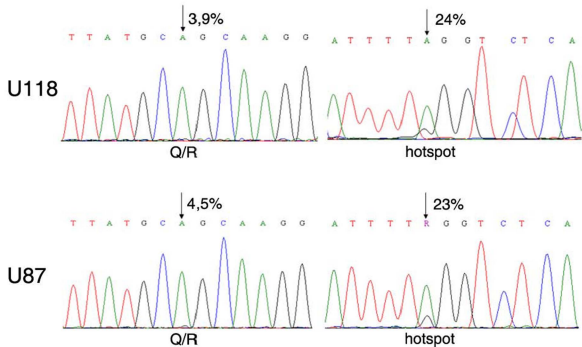

Fig. S2

**A**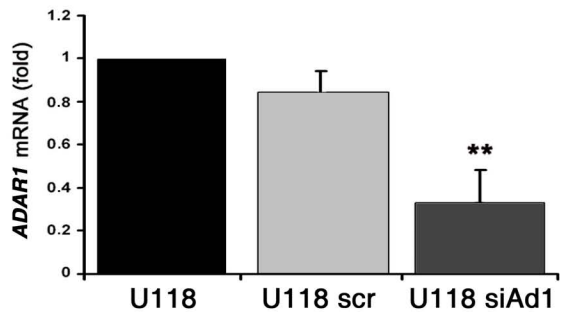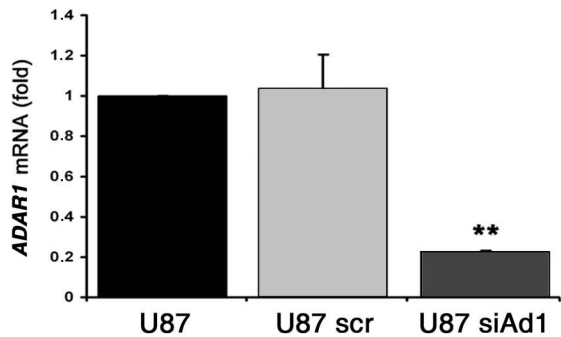**B**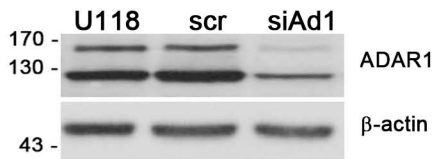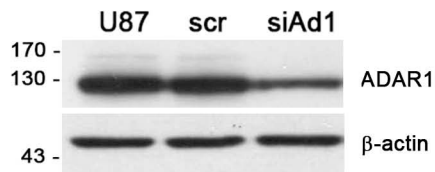

Fig. S3

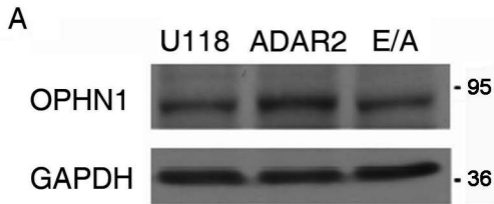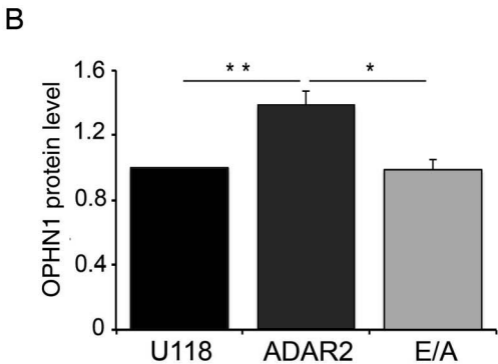

Fig. S4

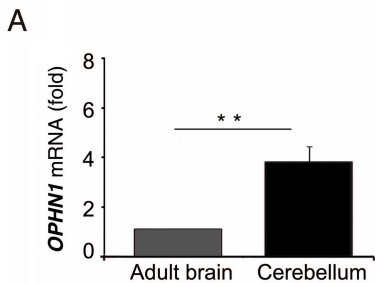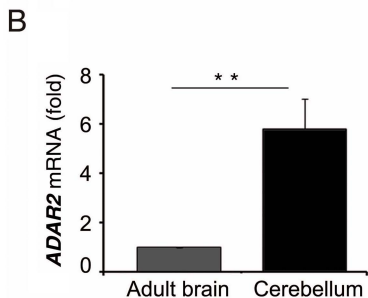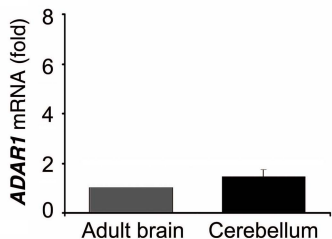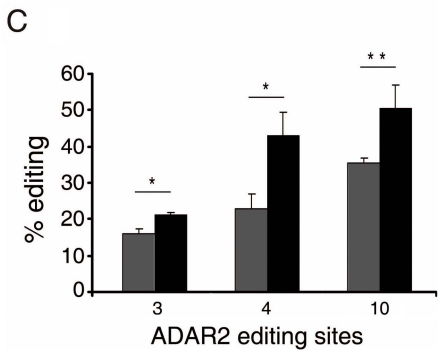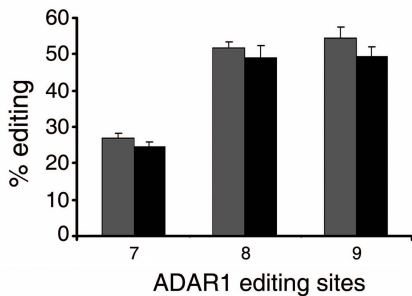

Fig. S5

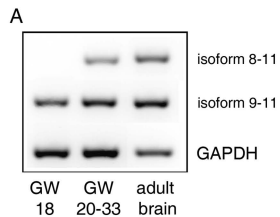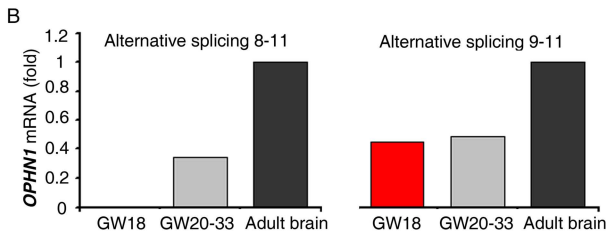

Fig. S6

**Table S1**

| <b>OPHN1 - gDNA</b> | <b>Forward</b>              | <b>Reverse</b>               |
|---------------------|-----------------------------|------------------------------|
| Ex2 gDNA            | 5'-gtgcattgatgetctcgg-3'    | 5'-atttgcctcagagatcggg-3'    |
| Ex3 gDNA            | 5'-cctgctcagagcacttacc-3'   | 5'-ccaagtgctctgtatccaca-3'   |
| Ex4 gDNA            | 5'-gtctgtcaagcaccatgatta-3' | 5'-gcaccaagaagctatctgac-3'   |
| Ex5 gDNA            | 5'-aggaatcttgtatctgaac-3'   | 5'-gtcatgttagctgaggctac-3'   |
| Ex6 gDNA            | 5'-gacagagttacaactacagac-3' | 5'-ctgtttctaaggcatag-3'      |
| Ex7 gDNA            | 5'-tggaccagaaactggaatcc-3'  | 5'-ttccactgattatccttcacg-3'  |
| Ex8 gDNA            | 5'-agggattacaggcataagcc-3'  | 5'-ttggataggagttagtaacc-3'   |
| Ex9 gDNA            | 5'-tgcacatgctgtaagcaggg-3'  | 5'-aattcactgccgacaagtgg-3'   |
| Ex10 gDNA           | 5'-gactctgaagagcaatgtgta-3' | 5'-atggcctcacgtaacagtga-3'   |
| Ex11 gDNA           | 5'-gacactgaagacactgtagg-3'  | 5'-ggacattgccaatttcacagc-3'  |
| Ex12 gDNA           | 5'-tctgtaagcctatgctgttc-3'  | 5'-actcatacactggcatatgct-3'  |
| Ex13 gDNA           | 5'-cgctggcctgttcaagta-3'    | 5'-cccatattcagacttgcgttag-3' |
| Ex14 gDNA           | 5'-ttaataggtgacacctgttc-3'  | 5'-gcttgcataccactagtttag-3'  |
| Ex15 gDNA           | 5'-atttgagagatgctgtagg-3'   | 5'-cacatttagcagtgtctcc-3'    |
| Ex16 gDNA           | 5'-cagaccagaatgcagtcag-3'   | 5'-cacgttaactccgctcaaca-3'   |
| Ex17 gDNA           | 5'-agaatccaataccagctgc-3'   | 5'-cttgagttagacagcaagcaa-3'  |
| Ex18 gDNA           | 5'-gctcaatccagttgccag-3'    | 5'-ttcctcacagagcattcagc-3'   |
| Ex19 gDNA           | 5'-ttgtaatcttgcttccaatac-3' | 5'-ggaagacaggtagttagaata-3'  |
| Ex20 gDNA           | 5'-ctagatataaggccaacaag-3'  | 5'-tggcatgccaccgcttct-3'     |
| Ex21 gDNA           | 5'-tgccacagtacataactg-3'    | 5'-ctcagaaggatctcaagg-3'     |
| Ex22 gDNA           | 5'-agccagagttgttagtcacc-3'  | 5'-gcctagtacaggacttcag-3'    |
| Ex23 gDNA           | 5'-attggttctcacgtgtatacc-3' | 5'-tgtatgctaaggatgcagttat-3' |
| Ex24 gDNA           | 5'-tagcactggcctagaagtgt-3'  | 5'-cgtaatgaaggcttatgtgga-3'  |

| <b>OPHN1 - cDNA</b> |                                |
|---------------------|--------------------------------|
| cDNA-1Fw            | 5'-actgcgatagttagttagctctcc-3' |
| cDNA-1Rev           | 5'-ccgctccttgggtgaag-3'        |
| cDNA-2Fw            | 5'-ttgctgattaaaccttggaaaa-3'   |
| cDNA-2Rev           | 5'-acatctctgggcatttagg-3'      |
| cDNA-3Fw            | 5'-agaacctatctaccacagcc-3'     |
| cDNA-3Rev           | 5'-agtttcccactcctctgaa-3'      |
| cDNA-4Fw            | 5'-ccctggatgaaagcgaagat-3'     |
| cDNA-4Rev           | 5'-cttcagaacctggaaaggg-3'      |
| AluJo Fw            | 5'-acataaggcactaaggctc-3'      |
| AluJo Rev           | 5'-gcctgagcaacatagtgaga-3'     |
| AluSZ Fw            | 5'-aagtgatgggagagatagac-3'     |
| AluSZ Rv            | 5'-cacaacctgcttactca-3'        |
| AluJo 2Fw           | 5'-cccaactacaagtgtcagg-3'      |
| AluJo 2 Rev         | 5'-aacttagccaagtgtagtgg-3'     |

| <b>OPHN1 - splicing</b> |                            |
|-------------------------|----------------------------|
| Splice exons 8-11 Fw    | 5'-cagtttacagaatgggcct-3'  |
| Splice exons 9-11 Fw    | 5'-aagagaaatgggccttggga-3' |
| Splice 12-13 Rev        | 5'-ggctgtgtagatggttct-3'   |
| Exon 8 Fw               | 5'-agcctgttggccttct-3'     |
| Exon 11 Rev             | 5'-ggttctggccttctcattag-3' |
