# Supplementary material for: Oligophrenin-1 (OPHN1), a Gene Involved in X-Linked Intellectual Disability, Undergoes RNA Editing and Alternative Splicing during Human Brain Development
Source: PubMed Central journal article supplement (PMC3956665; doi:10.1371/journal.pone.0091351), 2014-03-17
Supplement: pone.0091351.s002.pdf [file pone.0091351.s002.pdf]

## **Supporting Information Methods**

### **Immunoblotting**

Total protein extracts were isolated with RIPA lysis buffer (20 mM Tris-HCl (pH 7.5), 150 mM NaCl, 1 mM Na<sub>2</sub>EDTA, 1 mM EGTA, 1% NP-40, 1% sodium deoxycholate, 2.5 mM sodium pyrophosphate, 1 mM  $\beta$ -glycerophosphate) in the presence of a protease inhibitor mixture and phosphatase inhibitor cocktail (Sigma-Aldrich, St. Luis, MO, USA). Equal amounts of total cellular lysates (30  $\mu$ g) were separated by SDS-PAGE, transferred on nitrocellulose membrane and analysed by immunoblotting with the appropriate antibodies and then revealed by ECL (GE Healthcare, Buckinghamshire, UK). The antibodies used in this study are: anti-OPHN1 (1:500, ProteinTech, Chicago, IL, USA), anti-ADAR1 (1:500, Sigma; 1:5000, polyclonal antibody [25]), anti-ADAR2 (1:200, Sigma), anti- $\beta$ -actin (1:5000, Santa Cruz Biotechnology, Dallas, Texas, USA) and anti-GAPDH (1:5000, Cell Signaling, Danvers, MA, USA). The protein specific signals were quantified by densitometric analysis.

### **Semiquantitative RT-PCRs**

The semiquantitative RT-PCRs were performed with Expand high fidelity Plus PCR System (Roche), using specific primers (0.2  $\mu$ M each). PCR was conducted with the following parameters: 94 °C for 5 min, followed by 25 cycles 94 °C for 30 s, 56–60 °C for 30 s, and 72 °C for 1 min and by a final extension at 72 °C for 7 min. The *GAPDH* was chosen as internal control. The gene-specific primer pairs used for RT-PCR are described in Table S1 (OPHN1-splicing) in File S. The PCR products were run on a 1.5% agarose gel and the images acquired through the Gel-Doc apparatus (Bio-Rad) were analyzed using Quantity One software (Bio-Rad), in accordance with the manufacturer's instructions.
